# Supplementary material for: Impact of Multidrug-Resistant Organisms on Severe Acquired Brain Injury Rehabilitation: An Observational Study
Source: MDPI journal article supplement (doi:10.3390/microorganisms12040830), 2024-04-19
Supplement: s1 [file s1]

## Supplementary Materials

**Supplementary Table S1.** Factors associated with HAI incidence: results of univariate and age-adjusted Poisson regressions.

|                                                  | <b>Crude</b><br><b>IRR<sup>1</sup> (95%CI)</b> | <b>p-value</b> | <b>Age adjusted</b><br><b>IRR<sup>1</sup> (95%CI)</b> | <b>p-value</b> |
|--------------------------------------------------|------------------------------------------------|----------------|-------------------------------------------------------|----------------|
| <b>Male</b>                                      | 1.31 (0.85 – 2.01)                             | 0.221          |                                                       |                |
| <b>Age</b>                                       | 1.03 (1.01 – 1.04)                             | <0.001         |                                                       |                |
| <b>Aetiology (ref. traumatic)</b>                | 1.49 (0.89 – 2.49)                             | 0.269          |                                                       |                |
| <b>Vascular</b>                                  | 1.33 (0.84 – 2.08)                             |                |                                                       |                |
| <b>Other</b>                                     |                                                |                |                                                       |                |
| <b>Comorbidity</b>                               | 1.71 (1.11 – 2.65)                             | 0.016          | 1.02 (0.61 – 1.70)                                    | 0.947          |
| <b>LCF upon admission</b>                        | 1.00 (0.88 – 1.14)                             | 0.988          |                                                       |                |
| <b>DRS upon admission</b>                        | 1.01 (0.98 – 1.06)                             | 0.475          |                                                       |                |
| <b>CPE colonization (ref. No)</b>                | 1.55 (0.88 – 2.73)                             | 0.009          | 1.55 (0.88 – 2.73)                                    | 0.116          |
| <b>Upon admission</b>                            | 2.24 (1.20 – 3.84)                             |                | 1.76 (1.00 – 3.08)                                    |                |
| <b>During hospitalization</b>                    |                                                |                |                                                       |                |
| <b>Pre-admission surgery</b>                     | 0.69 (0.46 – 1.02)                             | 0.066          |                                                       |                |
| <b>Surgery over hospitalization</b>              | 0.72 (0.48 – 1.06)                             | 0.092          |                                                       |                |
| <b>Number of transfers</b>                       | 0.85 (0.67 – 1.06)                             | 0.152          |                                                       |                |
| <b>Number of Indwelling Catheter</b>             | 0.98 (0.84 – 1.13)                             | 0.752          |                                                       |                |
| <b>Indwelling Catheter days (ref. 0-14 days)</b> | 1.53 (0.65 – 3.57)                             | 0.012          | 1.51 (0.64 – 3.53)                                    | 0.154          |
| <b>15-60 days</b>                                | 2.45 (1.13 – 5.33)                             |                | 1.96 (0.89 – 4.31)                                    |                |
| <b>&gt;60 days</b>                               |                                                |                |                                                       |                |
| <b>Number of Central Venous Catheter</b>         | 1.09 (0.84 – 1.41)                             | 0.541          |                                                       |                |
| <b>CVC days (ref. 0)</b>                         |                                                | 0.021          |                                                       | 0.455          |
| <b>1-31 days</b>                                 | 0.68 (0.39 – 1.17)                             |                | 0.73 (0.42 – 1.25)                                    |                |
| <b>&gt;31 days</b>                               | 1.37 (0.88 – 2.14)                             |                | 0.99 (0.61 – 1.61)                                    |                |
| <b>Tracheotomy tube (ref. No)</b>                | 2.01 (0.74 – 5.48)                             | 0.170          |                                                       |                |
| <b>Tracheotomy tube days (ref. 0-30 days)</b>    | 1.51 (0.69 – 3.28)                             | 0.005          | 1.34 (0.62 – 2.92)                                    | 0.157          |
| <b>31-120 days</b>                               | 2.49 (1.24 – 4.98)                             |                | 1.83 (0.89 – 3.77)                                    |                |
| <b>&gt;120 days</b>                              |                                                |                |                                                       |                |
| <b>PEG or PEJ (ref. No)</b>                      | 1.93 (1.12 – 3.34)                             | 0.019          | 1.60 (0.91 – 2.80)                                    | 0.086          |
| <b>PEG or PEJ days (ref. 0)</b>                  |                                                | 0.010          |                                                       | 0.142          |
| <b>1-200 days</b>                                | 2.52 (1.35 – 4.67)                             |                | 1.88 (0.99 – 3.58)                                    |                |
| <b>&gt;200 days</b>                              | 1.72 (0.97 – 3.03)                             |                | 1.50 (0.84 – 2.67)                                    |                |

<sup>1</sup>. IRR: incidence rate ratio.

Legend: MDRO Multidrug Resistant Organisms, HAI healthcare associated infection, LCF levels of cognitive functioning, DRS disability rating scale, CPE carbapenemase-producing Enterobacteriaceae, PEG percutaneous endoscopic gastrostomy, PEJ percutaneous endoscopic jejunostomy.

**Supplementary Table S2.** Factors associated with MDRO HAI incidence: results of univariate and age-adjusted Poisson regressions.

|                                                 | <b>Crude<br/>IRR<sup>1</sup> (95%CI)</b> | <b>p-value</b>   | <b>Age adjusted<br/>IRR<sup>1</sup> (95%CI)</b> | <b>p-value</b> |
|-------------------------------------------------|------------------------------------------|------------------|-------------------------------------------------|----------------|
| <b>Male</b>                                     | 1.25 (0.55 – 2.86)                       | 0.594            |                                                 |                |
| <b>Age</b>                                      | 1.06 (1.03 – 1.09)                       | <b>&lt;0.001</b> |                                                 |                |
| <b>Aetiology (ref. traumatic)</b>               |                                          | <b>0.003</b>     |                                                 | 0.086          |
| <b>Vascular</b>                                 | 1.93 (0.65 – 5.76)                       |                  | 0.68 (0.19 – 2.48)                              |                |
| <b>Other</b>                                    | 5.25 (1.87 – 14.7)                       |                  | 1.76 (0.49 – 6.29)                              |                |
| <b>Comorbidity</b>                              | 1.56 (0.66 – 3.69)                       | 0.310            |                                                 |                |
| <b>LCF upon admission</b>                       | 1.20 (0.94 – 1.54)                       | 0.134            |                                                 |                |
| <b>DRS upon admission</b>                       | 0.98 (0.91 – 1.05)                       | 0.542            |                                                 |                |
| <b>CPE colonization (ref. No)</b>               |                                          | <b>0.019</b>     |                                                 | 0.065          |
| <b>Upon admission</b>                           | 4.77 (1.07 – 21.3)                       |                  | 4.59 (1.02 – 20.5)                              |                |
| <b>During hospitalization</b>                   | 5.45 (1.23 – 24.2)                       |                  | 3.09 (0.68 – 14.1)                              |                |
| <b>Pre-admission</b>                            | 0.59 (0.28 – 1.26)                       | 0.171            |                                                 |                |
| <b>Surgery</b>                                  |                                          |                  |                                                 |                |
| <b>Surgery during hospitalization</b>           | 0.56 (0.26 – 1.20)                       | 0.135            |                                                 |                |
| <b>Number of transfers</b>                      | 0.72 (0.45 – 1.14)                       | 0.157            |                                                 |                |
| <b>Indwelling catheter days (ref. 0-14days)</b> | 1.08 (0.82 – 1.41)                       | 0.580            |                                                 |                |
| <b>15-60days</b>                                | 1.21 (0.24 – 6.26)                       | 0.207            |                                                 |                |
| <b>&gt;60 days</b>                              | 2.39 (0.56 – 10.2)                       |                  |                                                 |                |
| <b>Central venous catheter</b>                  | 1.43 (0.86 – 2.37)                       | 0.168            |                                                 |                |
| <b>days (ref. 0)</b>                            |                                          | <b>&lt;0.001</b> |                                                 | <b>0.029</b>   |
| <b>1-31 days</b>                                | 0.10 (0.01 – 0.86)                       |                  | 0.13 (0.02 – 0.98)                              |                |
| <b>&gt;31 days</b>                              | 1.62 (0.74 – 3.57)                       |                  | 0.85 (0.34 – 2.09)                              |                |
| <b>Tracheostomy tube (ref. No)</b>              | 1.04 (0.25 – 4.38)                       | 0.959            |                                                 |                |
| <b>days (ref. 0-30days)</b>                     |                                          | 0.094            |                                                 |                |
| <b>31-120 days</b>                              | 1.54 (0.30 – 7.95)                       |                  |                                                 |                |
| <b>&gt;120 days</b>                             | 3.20 (0.75 – 13.7)                       |                  |                                                 |                |
| <b>PEG or PEJ (ref. No)</b>                     | 1.94 (0.67 – 5.60)                       | 0.223            |                                                 |                |
| <b>PEG or PEJ days</b>                          |                                          | 0.096            |                                                 |                |
| <b>(ref. 0)</b>                                 | 3.14 (0.99 – 10.0)                       |                  |                                                 |                |
| <b>1-200 days</b>                               | 1.49 (0.49 – 4.58)                       |                  |                                                 |                |
| <b>&gt;200 days</b>                             |                                          |                  |                                                 |                |

<sup>1</sup>. IRR: incidence rate ratio.

Legend: MDRO Multidrug Resistant Organisms, HAI healthcare associated infection, LCF levels of cognitive functioning, DRS disability rating scale, CPE carbapenemase-producing Enterobacteriaceae, PEG percutaneous endoscopic gastrostomy, PEJ percutaneous endoscopic jejunostomy.
